# Supplementary material for: Physicochemical Properties and Effects of Fruit Pulps from the Amazon Biome on Physiological Parameters in Rats
Source: MDPI journal article supplement (doi:10.3390/nu13051484), 2021-04-28
Supplement: s1 [file s1]

**Tabela S1.** Biochemical results after Amazonian pulp fruits consumption in Wistar rats (n=10 rats/group).

| Experimental Group                                         | Hematocrit<br>(%)       | Leukocytes<br>(mm <sup>3</sup> ) | Blood glucose<br>(mg/dL) | Cholesterol<br>(mg/dL)   | Triacylglycerols<br>(mg/dL) | TGO<br>(U/I)            | TGP<br>(U/I)           | Urea<br>(mg/dL)         | Creatine<br>(mg/dL)     |
|------------------------------------------------------------|-------------------------|----------------------------------|--------------------------|--------------------------|-----------------------------|-------------------------|------------------------|-------------------------|-------------------------|
| T1- Control                                                | 0,42 <sup>a</sup> ±0,03 | 7670 <sup>a</sup> ±1381,9        | 97 <sup>a</sup> ±20,1    | 108,9 <sup>a</sup> ±7,8  | 61,4 <sup>a</sup> ±9,3      | 98 <sup>a,b</sup> ±18,6 | 39,7 <sup>a</sup> ±7,1 | 25,2 <sup>a</sup> ±5,7  | 0,26 <sup>a</sup> ±0,04 |
| T2 – Araçá-boi<br>( <i>Eugenia stipitata</i> )             | 0,45 <sup>a</sup> ±0,01 | 6930 <sup>a</sup> ±506,2         | 96 <sup>a</sup> ±11,2    | 101,3 <sup>a</sup> ±22,7 | 74,6 <sup>a,b</sup> ±11,6   | 82 <sup>a</sup> ±4,6    | 36,7 <sup>a</sup> ±4,3 | 23,1 <sup>a</sup> ±1,8  | 0,28 <sup>a</sup> ±0,02 |
| T3 – Abiu<br>( <i>Pouteria caimito</i> )                   | 0,43 <sup>a</sup> ±0,01 | 4167 <sup>b</sup> ±1410,9        | 96 <sup>a</sup> ±11,2    | 103,2 <sup>a</sup> ±15,6 | 74,3 <sup>a,b</sup> ±22,8   | 85 <sup>a,b</sup> ±8,5  | 38,1 <sup>a</sup> ±3,2 | 22,1 <sup>a</sup> ±1,5  | 0,30 <sup>a</sup> ±0,06 |
| T4 – Araticum<br>( <i>Annona crassiflora</i> )             | 0,46 <sup>a</sup> ±0,02 | 4365 <sup>b</sup> ±1186,3        | 88 <sup>a</sup> ±28,5    | 119 <sup>a</sup> ±17,0   | 99,5 <sup>b</sup> ±36,1     | 91 <sup>a,b</sup> ±14,4 | 40,6 <sup>a</sup> ±5,8 | 23,3 <sup>a</sup> ±2,4  | 0,28 <sup>a</sup> ±0,02 |
| T5 – Biri-biri<br>( <i>Averrhoa bilimbi</i> L.)            | 0,44 <sup>a</sup> ±0,03 | 7025 <sup>a</sup> ±1103,1        | 90 <sup>a</sup> ±14,62   | 105,8 <sup>a</sup> ±11,9 | 78,5 <sup>a,b</sup> ±27,8   | 116 <sup>b</sup> ±26,1  | 37,7 <sup>a</sup> ±4,5 | 28,17 <sup>a</sup> ±2,6 | 0,27 <sup>a</sup> ±0,03 |
| T6 – Yellow Mangosteen<br>( <i>Garcinia xanthochymus</i> ) | 0,43 <sup>a</sup> ±0,01 | 6205 <sup>a</sup> ±779,0         | 99 <sup>a</sup> ±10,7    | 104,9 <sup>a</sup> ±18,4 | 86,2 <sup>a,b</sup> ±32,5   | 81 <sup>a</sup> ±9,9    | 36,8 <sup>a</sup> ±4,8 | 22,3 <sup>a</sup> ±2,6  | 0,28 <sup>a</sup> ±0,04 |

<sup>1</sup>Mean ± standard deviation. n = 10. Means followed by the same letters in a column do not differ significantly (p≤0.05) by the one-way ANOVA

test followed by post-hoc Tukey test or Kruskal Wallis test.
